# Supplementary material for: Pharmacological Management of Persistent Hostility and Aggression in Persons With Schizophrenia Spectrum Disorders: A Systematic Review
Source: Atypon-hosted journal article supplement (doi:10.1176/appi.neuropsych.13110335), 2014-10-01
Supplement: appi.neuropsych.13110335.ds001.pdf [file appi.neuropsych.13110335.ds001.pdf]

Legend to Tables 3–7: Peer reviewed articles reporting on the efficacy of pharmacological agents for the management of aggression in schizophrenia spectrum disorders

**Abbreviations for Journal Names**

Acta Psych Scand=Acta Psychiatrica Scandinavica  
AJP=American Journal of Psychiatry  
Arch Gen Psych=Archives of General Psychiatry  
Aust NZ J MHN=Australian and New Zealand Journal of Mental Health Nursing  
Bio Psych=Biological Psychiatry  
BJP=British Journal of Psychiatry  
B Am Acad PL=Bulletin of the American Academy of Psychiatry and the Law  
CBMH=Criminal Behavior and Mental Health  
Clin NP=Clinical Neuropharmacology  
Clin Pharm=Clinical Pharmacy  
Clin Ther=Clinical Therapeutics  
Cur Med Res Op=Current Medical Research and Opinion  
Cur Ther Res=Current Therapeutic Research: Clinical and Experimental  
Eur Psych=European Psychiatry  
Eur NP=European Neuropharmacology  
Eur NPP=European Neuropsychopharmacology  
Eur Psychol=European Psychologist  
Eur Psych=European Psychiatry  
HCP=Hospital and Community Psychiatry  
IJPBS=Iranian Journal of Psychiatry and Behavioral Sciences  
IJPCP=International Journal of Psychiatry in Clinical Practice  
Int Clin PP=International Clinical Psychopharmacology  
Iran JMS=Iranian Journal of Medical Science  
J Aff D=Journal of Affective Disorders  
JAAPL=Journal of the American Academy of Psychiatry and the Law  
JCP=Journal of Clinical Psychiatry  
Jm Clin PP=Journal of Clinical Psychopharmacology  
J Int Med Res = Journal of International Medical Research  
J Kor MA=Journal of the Korean Medical Association  
J Psych Res=Journal of Psychiatric Research  
Neuro PP=Neuropsychopharmacology  
Pharm psych=Pharmacopsychiatry  
Pharmako=Pharmakopsychiatrie  
Psych P B=Psychopharmacology Bulletin  
Pharm ther=Pharmatherapeutica  
Psych Fenn=Psychiatria Fennica  
Psych Quart=The Psychiatric quarterly  
Psych Serv=Psychiatric Services  
Schiz Bull=Schizophrenia Bulletin  
Schiz Res=Schizophrenia Research  
Yon MJ=Yonsei Medical Journal

**Abbreviations for recording methods:**

Adj=Adjunctive therapy  
Agg=aggression  
Dur – duration of study  
Jrnl=name of journal  
N/A=not applicable  
NR=not reported  
PHR=Post hoc reanalysis  
Prosp obs=prospective observational study  
RCT – randomized allocation controlled trial  
Retro=retrospective study

**Abbreviations for medications:**

AEDs=antiepileptic drugs  
AMIS=amisulpride  
AntiCh=anticholinergics  
AntiD – antidepressants  
AntiP=antiparkinsonian medications  
ARI=aripiprazole  
Asen=asenepine  
Benzos=benzodiazepines  
Benztr=benztropine mesylate  
CBZ=carbamazepine  
Chlorp=chlorpromazine  
Chloral H=chloral hydrate  
Clon=clonazepam  
Cloz=clozapine  
Diaz=diazepam  
Diphenh=diphenhydramine HCl  
DPH=Diphenylhydantoin  
Fam=famotidine  
Fluni=flunitrazepam  
Fluph=fluphenazine  
HAL=haloperidol  
IMI=impiramine  
Lor=lorazepam  
Lox=loxapine  
Meso=mesoridazine  
NAD=nadolol  
Olan=olanzapine  
Oxa=oxazepam  
PAL=paliperidone ER  
Perph=perphenazine  
PIN=pindolol  
PROP=propranolol  
Quet=quetiapine  
Risp=risperidone  
SAM-E=S-adenosyl-methionine  
Sone=Sonepiprazole  
TCAs=tricyclic antidepressants  
Tem=temazepam  
Thioth=thiothixene  
Thior=thioridazine  
Topm=topiramate  
Trif=trifluoperazine  
VPA=valproic acid  
Zip=ziprazadone  
Zuc=zuclopenthixol acetate

**Abbreviations for measurement methods:**

ACES=Agitation-Calmness Evaluation Scale (Meehan et al., 2002)  
Aggm. = aggression  
Agg Behav Seq Para=Aggressive Behavior Sequence Paradigm (Goldstein et al., 1987)  
BDHI=Buss Durkee Hostility Inventory (Buss and Durkey, 1957)  
BIS=Barratt Impulsiveness Scale (Patton, Stanford, and Barratt, 1995)  
BPRS AI=agitation item from the Brief Psychiatric Rating Scale (BPRS; Overall and Gorham, 1962)  
BPRS HF=BPRS hostility factor (note: several manuscripts report that the study analyzed the “hostility factor” or “hostility cluster” without a citation. Most such studies appear to be referring either to the BPRS hostility/suspiciousness ((factor V); Hedlung and Vieweg, 1980), or to Marder factor 4.

BRPS H/S=BPRS hostility/suspiciousness (factor V); (the sum of items 10=hostility, 11=suspiciousness, and 14=uncooperativeness (Guy, 1976)  
BRPS HI=hostility item from the BPRS  
CGI-A=Clinical Global Impression (Guy, 1976) aggression severity measure (Huber et al., 2008).  
MacArthur=MacArthur Community Violence Questionnaire (Monahan and Steadman, 1994).  
MACL AC=Mood Adjective Checklist Aggression Cluster (Nowlis, 1953)  
MAI=Multidimensional Anger Inventory (Siegel, 1986)  
MOAS=Modified Overt Aggression Scale (Sorgi, et al., 1991)  
NOSIE IS: Nurses' Observation Scale for Inpatient Evaluation (Honigfeldt 1965, 1973) Irritability Scale  
OAS=Overt Aggression Scale (Yudofsky et al., 1986)  
OAS TAS=total aggression score on OAS  
PANSS=Positive and Negative Symptoms Scale (Kay et al., 1987)  
PANSS HI=Positive and Negative Symptoms Scale hostility item  
PANNS HF=Positive and Negative Symptoms Scale hostility factor=sum of hostility, excitement, poor impulse control, and uncooperativeness (Kay and Sevy, 1990; Peuskens, 1992; Bell et al., 1994).  
PANSS UH/E=Positive and Negative Symptoms Scale uncontrolled hostility/excitement factor, aka Marder factor 4=sum of hostility and excitement items; Lindenmayer et al., 1995; Marder et al., 1997).  
Plutchik IS=Plutchik Impulsivity Scale (Plutchik and van Praag, 1989).  
PSP agg=Personal and Social Functioning Scale, item 4: disturbing and aggressive behaviors (Morosini, 2000; Gagnon 2006)  
SCL-90-R AH=Symptom Checklist-90-R Anger-hostility factor (Derogatis, 1994).  
S&R data=seclusion and restraint data  
State-Trait PI anger=anger item on the State-Trait Personality Inventory (Spielberger, 1996).  
TSBC=Time sample behavior checklist 2.5 (Paul et al., 1987).  
WPRS AI=Wittenborn Psychiatric Rating Scale, aggression item (Wittenborn, 1955)

**Notes:**

1. Percent completion is reported to the nearest 1%
2. Some articles reported data for more than one category of research and therefore appear in more than one table.
